# Supplementary material for: Survival and transplantation outcomes of children less than 2 years of age with end-stage renal disease
Source: Springer Nature journal article supplement (doi:10.1007/s00467-012-2195-8), 2012-06-06
Supplement: MOESM1 [file 467_2012_2195_MOESM1_ESM.doc]

**SUPPLEMENTAL DATA**

|  | | **Hospitalizations** | | | | | |
| --- | --- | --- | --- | --- | --- | --- | --- |
| All | | Prior to age 2 | | Prior to transplant* | |
| **Age at start of RRT** | Number (%) Linked | Rate per patient-year | Median LOS (days) | Rate per patient-year | Median LOS (days) | Rate per patient-year | Median LOS (days) |
| **0 to < 3 months** | 16 (53.3) | 1.88 | 3.8 | 1.90 | 3.7 | 1.94 | 3.9 |
| **3 months to < 1 year** | 20 (60.6) | 2.63 | 4.0 | 3.33 | 7.7 | 2.08 | 5.0 |
| **1 - 2 years** | 18 (75.0) | 2.22 | 2.6 | 5.17 | 3.9 | 4.03 | 3.5 |

**Supplemental Table 1.** Hospitalization rates and median length of stay (LOS) by age at start of RRT. *Only includes those who were transplanted. Number (%) linked refers to the number of children identified in Canadian Organ Replacement Register) that we were able to identify/link to in the hospital utilization data set (Canadian Institute for Health Information Discharge Abstract Database).
